# Supplementary material for: Prediction of the Mechanism of Action of Fusaricidin on Bacillus subtilis
Source: PLoS One. 2012 Nov 21;7(11):e50003. doi: 10.1371/journal.pone.0050003 (PMC3503724; doi:10.1371/journal.pone.0050003)
Supplement: Table S1 — Gene Differentially expressed genes at 20 and 170 min. (XLSX) [file pone.0050003.s001.xlsx]

## Sheet: Sheet1
Gene	Changed folds		Discription	Sig	Reg
	20 min	170 min
yvgO	0.0354026	0.0189718	unknown; similar to unknown proteins	SigB
cggR	0.0435857	0.07966	transcriptional repressor of gapA	SigA	CggR
ywsB	0.0441942	0.0532897	unknown; similar to unknown proteins from B. subtilis
yflT	0.0476956	0.0285572	hypothetical protein
yfhK	0.0591286	0.0330318	unknown; similar to cell- division inhibitor	SigB,SigW
ydaG	0.0595399	0.0571145	unknown; similar to general stress protein	SigB
gspA	0.0595399	0.0451228	general stress protein	SigB
yqgZ	0.0633725	0.0540336	unknown; similar to unknown proteins	SigB
gsiB	0.0656073	0.0203335	general stress protein	SigB
rsbX	0.0660636	0.0547879	indirect negative regulator of sigma-B activity	SigA,SigB
katE	0.0688691	0.034674	catalase 2	SigB
opuE	0.0703162	0.060371	proline transporter	SigA,SigB
csbD	0.0769465	0.0712977	sigma-B-controlled gene	SigB
yvaA	0.0780207	0.0612138	unknown; similar to unknown proteins
mcsB	0.0865693	0.144586	modulator of CtsR repression	SigA,SigB	CtsR
yflA	0.0871715	0.0616395	unknown; similar to amino acid carrier protein	SigB
sigB	0.0883883	0.0712977	RNA polymerase general stress sigma factor	SigA,SigB
yoxB	0.0896222	0.0865693	hypothetical protein	SigB
dps	0.0960547	0.0807721	stress- and starvation-induced gene controlled by sigma-B	SigB
ykzA	0.098073	0.0448111	unknown; similar to organic hydroperoxide resistance protein	SigB
ywzA	0.102238	0.072293	unknown; similar to unknown proteins from B. subtilis
yhdF	0.102949	0.111878	unknown; similar to glucose 1-dehydrogenase	SigB
cypC	0.105843	0.102238	fatty acid beta-hydroxylating cytochrome P450
gapB	0.106579	0.251739	glyceraldehyde-3-phosphate dehydrogenase	SigA	YqzB
yfhM	0.106579	0.0791098	unknown; similar to epoxide hydrolase	SigB,SigW
ydaP	0.106579	0.0769465	unknown; similar to pyruvate oxidase	SigB
ytxJ	0.110338	0.0727958	unknown; similar to general stress protein	SigB,SigH
rapA	0.111878	0.0780207	response regulator aspartate phosphatase	SigA	ComA,SpoOA
pyrB	0.114229	0.162668	aspartate carbamoyl- transferase	SigA	PurR,PyrR
ygxB	0.114229	0.102238	hypothetical protein
yfkM	0.115023	0.0791098	unknown; similar to unknown proteins		Fur
ytxH	0.115824	0.0859714	unknown; similar to general stress protein	SigB,SigH
yfhL	0.115824	0.0785633	hypothetical protein	SigB,SigW
yfhE	0.11744	0.125869	hypothetical protein	SigF
yfkE	0.121582	0.100134	unknown; similar to H+/Ca2+ exchanger	SigG
ctsR	0.125	0.170755	transcriptional repressor of class III stress genes	SigA,SigB	CtsR
yhdN	0.125	0.102238	unknown; similar to aldo/keto reductase	SigB	YlpC
phrA	0.128514	0.0847878	phosphatase (RapA) inhibitor	SigA	ComA,SpoOA
ytxG	0.129408	0.123279	unknown; similar to general stress protein	SigB,SigH
csbC	0.131215	0.101532	putative sugar transporter	SigB
yqhB	0.132127	0.104386	unknown; similar to hemolysin		LexA
yqhA	0.135842	0.0934281	unknown; similar to positive regulator of sigma-B activity	SigB
purK	0.136787	0.186856	phosphoribosylaminoimidazole carboxylase II	SigA	PurR
yacK	0.142595	0.119908	unknown; similar to unknown proteins	SigA,SigB	CtsR
yfkI	0.143587	0.100134	hypothetical protein	SigA,SigB
ysnF	0.143587	0.072293	unknown; similar to unknown proteins	SigB
ywjA	0.144586	0.192109	unknown; similar to ABC transporter
yoxC	0.146604	0.126745	hypothetical protein	SigB
sboA	0.146604	0.0235195	subtilosin A	SigA	AbrB,ResD, Rok
rsbW	0.147624	0.136787	negative regulator of sigma-B activity (switch protein/serine kinase, anti-sigma factor)	SigA,SigB
ywjB	0.148651	0.222211	unknown; similar to unknown proteins
yfkJ	0.151774	0.115023	unknown; similar to protein-tyrosine phosphatase	SigA,SigB
yvrE	0.15283	0.186856	unknown; similar to senescence marker protein-30	SigB
clpC	0.154963	0.200267	class III stress response- related ATPase	SigA,SigB	CtsR
yjdB	0.156041	0.0310341	hypothetical protein		PhoP
ydhK	0.157127	0.108819	hypothetical protein	SigB
pckA	0.15932	0.301452	phosphoenolpyruvate carboxykinase	SigA	YqzB
bofC	0.15932	0.161544	forespore regulator of the sigma-K checkpoint	SigB,SigF,SigG	SpoVT
ycdF	0.15932	0.111105	unknown; similar to glucose 1-dehydrogenase
speD	0.162668	0.196146	S-adenosylmethionine decarboxylase	SigA	YqzB
ycbP	0.163799	0.134904	unknown; similar to unknown proteins from B. subtilis
yitT	0.166086	0.143587	unknown; similar to unknown proteins
ydbD	0.166086	0.139661	unknown; similar to manganese-containing catalase	SigB
yfhD	0.167241	0.185565	hypothetical protein	SigF
ywjC	0.168404	0.163799	hypothetical protein	SigB
katX	0.170755	0.115824	major catalase in spores	SigB,SigF	RsfA
yhxD	0.171943	0.116629	unknown; similar to alcohol dehydrogenase
yvgP	0.173139	0.241484	unknown; similar to unknown proteins
yjgD	0.178006	0.0883883	unknown; similar to unknown proteins from B. subtilis
csbX	0.179244	0.189465	sigma-B-transcribed gene	SigB,SigF,SigG	SpoVT
yocB	0.181747	0.060371	hypothetical protein
ywnF	0.188156	0.267943	unknown; similar to unknown proteins
pyrC	0.188156	0.25349	dihydroorotase	SigA	PurR,PyrR
ywmD	0.189465	0.0813339	unknown; similar to unknown proteins from B. subtilis
yjgC	0.192109	0.106579	unknown; similar to formate dehydrogenase
pbuX	0.19751	0.31864	xanthine permease	SigA	PurR
ykgA	0.19751	0.192109	unknown; similar to unknown proteins	SigB
albA	0.198884	0.102238	antilisterial bacteriocin production	SigA	AbrB,ResD, Rok
yfhF	0.20166	0.198884	unknown; similar to cell- division inhibitor	SigF
amyE	0.203063	0.149685	alpha-amylase	SigA	CcpA,DegU
nhaX	0.204476	0.151774	putative regulatory gene for nhaC	SigB
purL	0.20733	0.312083	Phosphoribosylformyl- glycinamidine synthetase II	SigA	PurR
yoaA	0.20733	0.175556	unknown; similar to ribosomal-protein-alanine N-acetyltransferase	SigB
bmrU	0.213159	0.210224	multidrug resistance protein cotranscribed with bmr	SigA,SigB	BmrR,Mta
yncM	0.213159	0.120742	unknown; similar to unknown proteins
purH	0.214641	0.323088	phosphoribosylaminoimidazole carboxy formyl formyl- transferase / inosine- monophosphate cyclohydrolase	SigA	PurR
ydaE	0.214641	0.170755	hypothetical protein	SigB
ynaB	0.216134	0.196146	hypothetical protein
csn	0.217638	0.0769465	chitosanase
ytiA	0.219151	0.228458	unknown; similar to ribosomal protein
yqgC	0.220676	0.238159	unknown; similar to unknown proteins
tatAY	0.222211	0.183011	putative component of the twin-arginine translocation pathway
yjgB	0.223756	0.153893	hypothetical protein	SigB
yybR	0.225313	0.234881	unknown; similar to ester hydrolase
yfkD	0.225313	0.161544	unknown; similar to unknown proteins	SigG
yycD	0.22688	0.211686	hypothetical protein	SigB
yvgN	0.230047	0.325335	unknown; similar to dehydrogenase
rnr	0.230047	0.228458	ribonuclease R
yfkH	0.231647	0.170755	unknown; similar to unknown proteins	SigA,SigB
yxiS	0.233258	0.142595	hypothetical protein	SigB
purB	0.236514	0.316439	adenylosuccinate lyase	SigA	PurR
proJ	0.236514	0.220676	glutamate 5-kinase
mcsA	0.239816	0.22688	modulator of CtsR repression	SigA,SigB	CtsR
gtaB	0.244855	0.238159	UTP-glucose-1-phosphate uridylyltransferase	SigA,SigB
ydaS	0.25	0.230047	hypothetical protein	SigB
ribE	0.25349	0.291183	riboflavin synthase	SigA
yerD	0.255253	0.223756	unknown; similar to glutamate synthase
yjbH	0.257028	0.327598	unknown; similar to unknown proteins
ydcG	0.258816	0.309927	unknown; similar to unknown proteins
ywtG	0.258816	0.244855	unknown; similar to metabolite transport protein	SigB
purC	0.260616	0.325335	phosphoribosylaminoimidazole succinocarboxamide synthetase	SigA	PurR
ytvB	0.260616	0.126745	hypothetical protein
yqgY	0.262429	0.238159	unknown; similar to unknown proteins
spoVC	0.269807	0.243164	probable peptidyl-tRNA hydrolase
yutM	0.271684	0.283221	unknown; similar to unknown proteins
ytkK	0.273573	0.279322	unknown; similar to 3-oxoacyl- acyl-carrier protein reductase
pyrR	0.273573	0.260616	transcriptional attenuation of the pyrimidine operon / uracil phosphoribosyltransferase activity	SigA	PurR,PyrR
degQ	0.273573	0.228458	degradative enzyme production	SigA	ComA,DegU
csbB	0.275476	0.188156	stress response protein	SigB,SigX
yacL	0.281265	0.251739	unknown; similar to unknown proteins	SigB
tatCY	0.281265	0.214641	component of the twin-arginine translocation pathway
yvaK	0.283221	0.323088	unknown; similar to carboxylesterase
yhdQ	0.283221	0.285191	unknown; similar to transcriptional regulator
purE	0.283221	0.279322	phosphoribosylaminoimidazole carboxylase I	SigA	PurR
bmr	0.287175	0.251739	multidrug-efflux transporter	SigA,SigB	BmrR,Mta
yqiW	0.293209	0.293209	unknown; similar to unknown proteins from B. subtilis
yugJ	0.303549	0.30566	unknown; similar to NADH-dependent butanol dehydrogenase
yoqM	0.30566	0.0733022	hypothetical protein
yneP	0.307786	0.29937	unknown; similar to unknown proteins
yfhJ	0.309927	0.30566	unknown; similar to unknown proteins
yktC	0.312083	0.329877	unknown; similar to inositol monophosphatase
yxzF	0.316439	0.314253	hypothetical protein
ycdG	0.31864	0.219151	unknown; similar to oligo-1,6-glucosidase
proH	0.320856	0.275476	pyrroline-5-carboxylate reductase
ynfC	0.323088	0.312083	hypothetical protein
yuzA	0.327598	0.293209	unknown; similar to unknown proteins	SigG
bpr	0.329877	0.134904	bacillopeptidase F
yurV	3.07375	3.65533	unknown; similar to NifU protein homolog
acuC	3.07375	3.01049	acetoin dehydrogenase	SigA	GerE
iolF	3.09513	3.73213	inositol transport protein	SigA
yrbE	3.16017	3.36359	unknown; similar to dehydrogenase
rplO	3.20428	3.24901	ribosomal protein L15		DegU,YvrH
rpsK	3.24901	3.13834	ribosomal protein S11
glnM	3.24901	3.01049	glutamine ABC transporter		AzlB
csd	3.27161	4.19887	probable cysteine desulfurase
yxxG	3.29436	3.36359	hypothetical protein	SigA	Zur
iolB	3.31728	3.27161	myo-inositol catabolism	SigA
ydbN	3.34035	3.75809	hypothetical protein
rplQ	3.34035	3.31728	ribosomal protein L17		CcpA,IolR,
ahpC	3.43426	6.02099	alkyl hydroperoxide reductase	SigA
acuB	3.53081	3.605	acetoin dehydrogenase	SigA
rocR	3.55537	3.75809	transcriptional activator of arginine utilization operons	SigA	CcpA
glnP	3.55537	3.36359	glutamine ABC transporter
ymaG	3.605	3.07375	unknown; similar to cell wall protein	SigK
iolC	3.65533	3.43426	myo-inositol catabolism	SigA	LmrA
ahpF	3.70635	5.89708	alkyl hydroperoxide reductase NADH dehydrogenase	SigA	LexA
rpmD	3.75809	4.14106	ribosomal protein L30
rbsK	3.81055	3.89062	ribokinase	SigA
rpsE	3.81055	3.41054	ribosomal protein S5
ycgN	3.91768	5.09824	unknown; similar to 1-pyrroline-5-carboxylate dehydrogenase		YdiH
ywcJ	3.91768	3.4822	unknown; similar to nitrite transporter	SigA
fhuB	3.94493	6.10504	ferrichrome ABC transporter		SpoOA
dppC	3.97237	3.05252	dipeptide ABC transporter	SigA
yfiG	4.05584	3.22657	unknown; similar to metabolite transport protein
ywbN	4.16986	4.50023	unknown; similar to unknown proteins	SigW,SigX
yteA	4.16986	3.41054	unknown; similar to unknown proteins	SigG	Fur
yxiM	4.19887	4.69134	unknown; similar to rhamnogalacturonan acetylesterase		CcpA,GlpP
glpF	4.19887	3.31728	glycerol uptake facilitator	SigA
yesF	4.25748	3.16017	unknown; similar to unknown proteins
lplD	4.31691	3.94493	hydrolytic enzyme		TnrA
ybfB	4.34694	4.19887	unknown; similar to unknown proteins
yxaH	4.37717	3.18215	unknown; similar to unknown proteins
ykoN	4.40762	3.01049	unknown; similar to unknown proteins from B. subtilis		LmrA
xynP	4.43828	3.11666	probable beta-xyloside transporter	SigA
yurH	4.43828	3.11666	unknown; similar to N-carbamyl-L-amino acid amidohydrolase	SigA	CcpA,XylR
glpQ	4.46915	4.92458	glycerophosphoryl diester phosphodiesterase	SigA	PucR
glpT	4.53154	5.93809	glycerol-3-phosphate permease	SigA	YsiA
ywjF	4.53154	3.31728	unknown; similar to iron-sulphur-binding reductase	SigA	GlpP,PhoP
ybbF	4.59479	3.605	unknown; similar to sucrose phosphotransferase enzyme II		GlpP,PhoP
hutP	5.20537	4.85678	transcriptional activator of the histidine utilization operon	SigA
acdA	5.38893	3.50642	acyl-CoA dehydrogenase	SigA
ytmO	5.50217	3.22657	unknown; similar to monooxygenase	SigA
fabI	5.54044	3.605	enoyl-acyl carrier protein reductase
yojB	5.6962	4.22807	unknown; similar to unknown proteins
yybC	5.6962	3.81055	hypothetical protein		YlpC
cotA	5.6962	3.34035	spore coat protein	SigK
yerA	5.89708	9.31787	unknown; similar to adenine deaminase		GerE,SpoIIID
yoaN	6.36429	3.53081	unknown; similar to unknown proteins	SigK
yusK	6.54322	3.43426	unknown; similar to acetyl- CoA C-acyltransferase	SigA	GerE
hutI	7.21	3.78423	imidazolone-5-propionate hydrolase	SigA	YsiA,YvbA
yusL	8.51496	3.83706	unknown; similar to 3-hydroxyacyl-CoA dehydrogenase	SigA	CcpA,DctR
hutU	9.98664	4.85678	urocanase	SigA	YsiA,YvbA
hutH	10.1965	4.37717	histidase	SigA	AbrB,CcpA, CodY,HutP
ymcC	12.996	14.723	hypothetical protein		AbrB,CcpA, CodY,HutP
